# Supplementary material
Source: Springer Nature journal article supplement (https://www.springermedizin.de/resource/supplementary/12935_2005_141_MOESM1_ESM.pdf/9541230)

**MCF-7**

**MDA-MB-231**

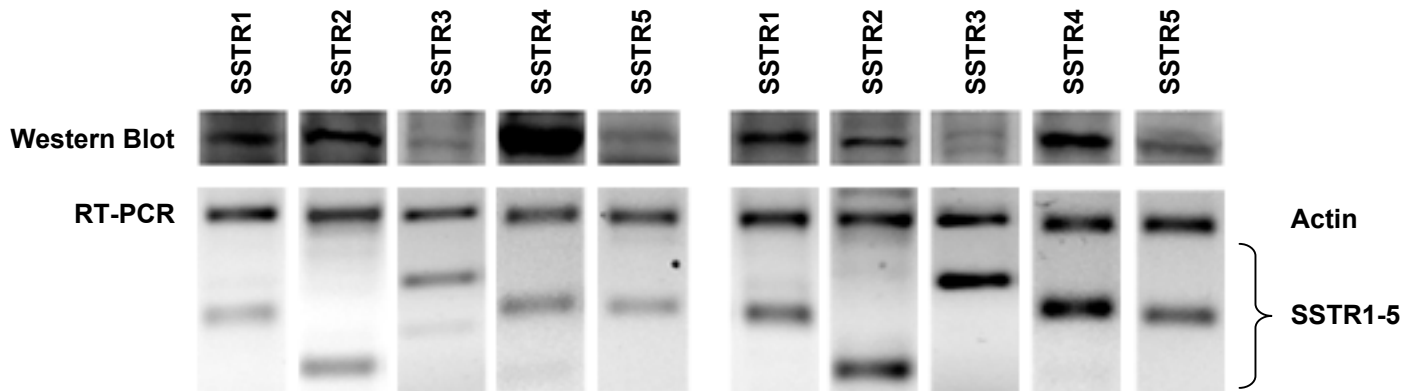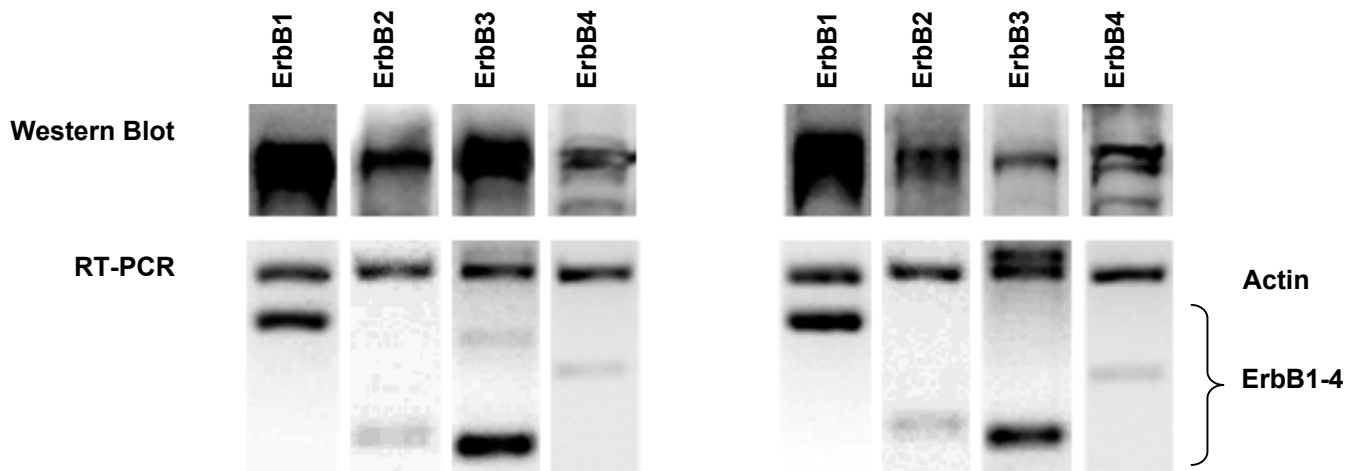

Supplement: MOESM1 [file 9541230]
